CORRECTION

# Correction: Congruent Deep Relationships in the Grape Family (Vitaceae) Based on Sequences of Chloroplast Genomes and Mitochondrial Genes via Genome Skimming

Ning Zhang, Jun Wen, Elizabeth A. Zimmer

There is an error in the fifth sentence of the Abstract. The correct sentence is: In this study, next-generation sequencing data sets of 27 species were obtained using genome skimming with total DNAs from silica-gel preserved tissue samples on an Illumina NextSeq 500 instrument.

There is an error in the second to last sentence of the “Sampling and DNA extraction” section of the Materials and Methods. The correct sentence is: Paired-end reads of 2 x 150 bp for all 27 species were generated in a single lane on an Illumina NextSeq 500 instrument.

## Reference

1. Zhang N, Wen J, Zimmer EA (2015) Congruent Deep Relationships in the Grape Family (Vitaceae) Based on Sequences of Chloroplast Genomes and Mitochondrial Genes via Genome Skimming. PLoS ONE 10(12): e0144701. doi:[10.1371/journal.pone.0144701](https://doi.org/10.1371/journal.pone.0144701) PMID: [26656830](https://pubmed.ncbi.nlm.nih.gov/26656830/)

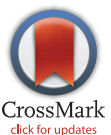

## OPEN ACCESS

**Citation:** Zhang N, Wen J, Zimmer EA (2016) Correction: Congruent Deep Relationships in the Grape Family (Vitaceae) Based on Sequences of Chloroplast Genomes and Mitochondrial Genes via Genome Skimming. PLoS ONE 11(3): e0152059. doi:[10.1371/journal.pone.0152059](https://doi.org/10.1371/journal.pone.0152059)

**Published:** March 17, 2016

**Copyright:** © 2016 Zhang et al. This is an open access article distributed under the terms of the [Creative Commons Attribution License](https://creativecommons.org/licenses/by/4.0/), which permits unrestricted use, distribution, and reproduction in any medium, provided the original author and source are credited.
